# Supplementary material for: A Spatial Multi-Omic Framework Identifies Gliomas Permissive to TIL Expansion
Source: Research Square preprint supplement (doi:10.21203/rs.3.rs-6314842/v1), 2025-04-25
Supplement: Supplementary file 1 [file 523d43e31d378c9f3cb92ebe.xlsx]

## Sheet: Antibody Information
Antibody	Clone	Company	Catalog Number	Oligo	RRID
Arg1	Polyclonal	Novus	NBP1-32731	43	AB_10003985
aSMA	Polyclonal	abcam	AB5694	69	AB_2223021
B-cat	14	Cell Marque	custom	51	AB_1158971
BCL2	124	Cell Marque	custom	41	AB_1158101
CD11b	EPR1344	abcam	ab209970	28	AB_2915959
CD138	DL-101	Biolegend	352302	76	AB_10915555
CD163	EDHu-1	Novus	NB100-64980	45	AB_959678
CD20	rlGEL/773	Novus	NBP2-54591	48	AB_2864380
CD206	E2L9N	CST	49243SF	55	AB_3675976
CD25	4C9	CellMarque	custom	24	AB_2864401
CD3	MRQ-39	CellMarque	MRQ-39	77	AB_2864399
CD31	C31.3+C31.7+C31.10	Novus	NBP2-47785	68	AB_2864381
CD34	QBEnd/10	Novus	NBP2-47909-0.1mg	38	AB_2864382
CD36	D8L9T	CST	14347	74	AB_2798458
CD38	E7Z8C	CST	custom	66	AB_3675778
CD4	EPR6855	abcam	ab181724	20	AB_2864377
CD45	2B11 + PD7/26	Novus	NBP2-34287	56	AB_3285704
CD56	MRQ-42	CellMarque	custom	29	AB_2864402
CD68	KP1	Biolegend	916104	70	AB_2616797
CD73	Polyclonal	R&D	AF5795	75	AB_1964487
CD8	C8/144B	Invitrogen	MA5-13473	8	AB_11000353
CD90	EPR3132	abcam	ab221607	21	AB_10563647
DCN	Polyclonal	Thermo	PA5-27370	63	AB_2544846
FOXP3	236A/E7	Invitrogen	14-4777-82	61	AB_467556
HLADR	EPR3692	abcam	ab209968	62	AB_3095318
Ki67	B56	BD	556003	6	AB_396287
MMP9	L51/82	Biolegend	819701	80	AB_2564833
p16	G175-405	BD	550834	59	AB_2078446
p53	D07	Cell Marque	custom	52	AB_2864403
pH2AX	EP854(2)Y	abcam	ab215967	57	AB_2864385
Vimentin	RV202	Novus	NBP1-97672	7	AB_2915945

## Sheet: CODEX Multicycle Runs
Date: 20240814	Well	Cycle #	Ax488	Oligo	uL/slide	Exp Time	Comment	Cy3	Oligo	uL/slide	Exp Time	Comment	Cy5	Oligo	uL/slide	Exp Time	Comment
Samples	C1	1	Vimentin	A7	0.5	150	*	LYVE1	A46	2	150	**	DCN	A63	1	150	**
05-0465	C2	2	CD31	A68	0.5	150	**	CD36	A74	1	150	**	CD90	A21	0.5	150	**
23-0257	C3	3	aSMA	A69	0.5	150	***	CD3	A77	0.5	150	**	CD73	A75	0.5	150	**
23-0264	C4	4	CD206	A55	0.5	150	**	CD57	A30	0.5	150	**	CD11b	A28	0.5	150	**
07-0190	C5	5	CD34	A38	0.5	150	**	CD163	A45	0.5	150	**	CD4	A20	0.5	150	**
04-0483	C6	6	BCL2	A41	0.5	150	**	p53	A52	0.5	150	**	PD1	A23	0.5	150	**
	C7	7	CD20	A48	0.5	150	**	CD25	A24	0.5	150	**	Podo	A32	0.5	150	**
	C8	8	p63	A5	0.5	150	ND	pH2AX	A57	0.5	150	***	B-cat	A51	0.5	150	**
	C9	9	Ki67	A6	0.5	150	**	FOXP3	A61	0.5	150	**	CD8	A8	0.5	150	**
	C10	10	CD56	A29	0.5	150	***	MMP9	A80	0.5	150	***	p16	A59	0.5	150	**
	C11	11	Arg1	A43	0.5	150	**	Annex	A42	0.5	150	**	PDL1	A11	0.5	150	ND
	C12	12	CD45	A56	0.5	150	*	Mast	A72	0.25	150	ND	CD103	A3	2	150	ND
	D1	13	CD68	A70	0.5	150	**	SPP1	A25	2	150	ND	EGFR	A17	2	150	ND
	D2	14	CD15	A14	0.5	150	ND	HLADR	A62	2	150	**	CD138	A76	2	150	**
	D3	15	Cyto	A67	0.5	150	ND	CD38	A66	2	150	***	CD106	A65	2	150	ND
	D4	16	CK14	A36	0.25	150	ND
	H3	17	Blank			150		Blank			150		Blank			150
	H4	18	Blank			150		Blank			150		Blank			150
Date: 20241003	Well	Cycle #	Ax488	Oligo	uL/slide	Exp Time	Comment	Cy3	Oligo	uL/slide	Exp Time	Comment	Cy5	Oligo	uL/slide	Exp Time	Comment
Samples	A1	1	aSMA	A69	0.5	150	***	LYVE1	A46	2	150	ND	DCN	A63	1	150	***
11-0020	A2	2	CD206	A55	0.5	150	*	CD36	A74	1	150	***	CD90	A21	0.5	150	***
23-0258	A3	3	CD34	A38	0.5	150	***	CD3	A77	0.5	150	***	CD73	A75	0.5	150	***
23-0227	A4	4	BCL2	A41	0.5	150	***	CD57	A30	0.5	150	ND	CD11b	A28	0.5	150	***
23-0021	A5	5	CD20	A48	0.5	150	**	CD163	A45	0.5	150	***	CD4	A20	0.5	150	**
04-0483	A6	6	Ki67	A6	0.5	150	***	p53	A52	0.5	150	***	PD1	A23	0.5	150	ND
	A7	7	CD56	A29	0.5	150	***	CD25	A24	0.5	150	***	Podo	A32	0.5	150	**
	A8	8	Arg1	A43	0.5	150	**	pH2AX	A57	0.5	150	***	B-cat	A51	0.5	150	***
	A9	9	CD68	A70	0.5	150	**	FOXP3	A61	0.5	150	***	CD8	A8	0.5	150	***
	A10	10						MMP9	A80	0.5	150	***	p16	A59	0.5	150	***
	A11	11						Mast	A72	0.25	150	**	CD138	A76	1	150	**
	A12	12						HLADR	A62	1	150	***	Vimentin	A7	0.5	150	**
	B1	13						CD38	A66	1	150	***	CD31	A68	0.5	150	***
	B2	14						CD45	A56	1	150	***	TCF7	A5	2	150	ND
	B3	15						Synaptophysin	A25	2	150	*	PDL1	A11	2	150	**
	B4	16						Granzyme B	A36	2	150	*	PDGRFab	A33	2	150	***
	B5	17											GFAP	A26	2	150	***
	H1	18	Blank			150		Blank			150		Blank			150
	H2	19	Blank			150		Blank			150		Blank			150
Date: 20241112	Well	Cycle #	Ax488	Oligo	uL/slide	Exp Time	Comment	Cy3	Oligo	uL/slide	Exp Time	Comment	Cy5	Oligo	uL/slide	Exp Time	Comment
Samples	D1	1	aSMA	A69	0.5	150	***	PD1	A23	0.5	150	?	DCN	A63	1	150	***
12-0347	D2	2	BCL2	A41	0.5	150	change channel	CD36	A74	1	150	**	CD90	A21	0.5	150	**
22-0189	D3	3	CD20	A48	0.5	150	change channel	CD3	A77	0.5	150	***	CD73	A75	0.5	150	***
22-0160	D4	4	Ki67	A6	0.5	150	***	CD163	A45	0.5	150	***	CD11b	A28	0.5	150	**
23-0153	D5	5	Arg1	A43	0.5	150	*	p53	A52	0.5	150	***	CD4	A20	0.5	150	**
04-0483	D6	6	Mast	A72	0.5	75	change channel	CD25	A24	0.5	150	?	Podo	A32	0.5	150	nuclear background
	D7	7						pH2AX	A57	0.5	150	***	B-cat	A51	0.5	150	**
	D8	8						FOXP3	A61	0.5	150	***	CD8	A8	0.5	150	***
	D9	9						MMP9	A80	0.5	150	***	p16	A59	0.5	150	**
	D10	10						HLADR	A62	1	150	***	CD138	A76	1	150	?
	D11	11						CD38	A66	1	150	***	Vimentin	A7	1	150	**
	D12	12						CD45	A56	1	150	?	CD31	A68	0.5	150	**
	E1	13						CD206	A55	0.5	150	?	CD34	A38	0.5	150	***
	E2	14						CD56	A29	0.5	150	***	CD57	A30	0.5	150	***
	E3	15						CD68	A70	0.5	150	?	LYVE1	A46	2	150	***
	E4	16						TCF7	A5	2	150	?	GFAP	A26	0.5	150	***
	E5	17						PDL1	A11	2	150	change channel back	TMEM119	A53	2	150	*
	E6	18						MPO	A42	2	150	?	PDGRFab	A33	2	150	***
	E7	19						CD66b	A49	2	150	***	P2RY12	A2	2	150	**
	E8	20						CD115	A58	2	150	switch channel	Synaptophysin	A25	2	150	**
	E9	21											Granzyme B	A36	2	150	*
	H3	22	Blank			150		Blank			150		Blank			150
	H4	23	Blank			150		Blank			150		Blank			150
