# Supplementary material for: A Spatial Multi-Omic Framework Identifies Gliomas Permissive to TIL Expansion
Source: Research Square preprint supplement (doi:10.21203/rs.3.rs-6314842/v1), 2025-04-25
Supplement: Supplementary file 2 [file 5f448f507f742cbe281e7bef.xlsx]

## Sheet: genelist with function
Gene	Ensembl ID	Probesets	Description
CA10	ENSG00000154975	7	carbonic anhydrase 10
CABLES1	ENSG00000134508	8	Cdk5 and Abl enzyme substrate 1
CCND2	ENSG00000118971	8	cyclin D2
CHRM3	ENSG00000133019	8	cholinergic receptor muscarinic 3
CKAP4	ENSG00000136026	8	cytoskeleton associated protein 4
CLU	ENSG00000120885	8	clusterin
DCX	ENSG00000077279	8	doublecortin
DDIT3	ENSG00000175197	8	DNA damage inducible transcript 3
DLX2	ENSG00000115844	8	distal-less homeobox 2
DPYD	ENSG00000188641	8	dihydropyrimidine dehydrogenase
DSCAM	ENSG00000171587	2	DS cell adhesion molecule
DUSP4	ENSG00000120875	8	dual specificity phosphatase 4
EGFP	EGFP	5	enhanced green fluorescent protein
EGFR_exon1_exon2	EGFR_exon1_exon2	1	enhanced green fluorescent protein
EGFR_exon1_exon8	EGFR_exon1_exon8	1	enhanced green fluorescent protein
EIF2AK3	ENSG00000172071	8	eukaryotic translation initiation factor 2 alpha kinase 3
EMC10	ENSG00000161671	8	ER membrane protein complex subunit 10
EPHA3	ENSG00000044524	8	EPH receptor A3
FAM107A	ENSG00000168309	8	family with sequence similarity 107 member A
FERMT1	ENSG00000101311	8	FERM domain containing kindlin 1
FGF12	ENSG00000114279	6	fibroblast growth factor 12
FLNA	ENSG00000196924	8	filamin A
FLT4	ENSG00000037280	8	fms related receptor tyrosine kinase 4
FOXM1	ENSG00000111206	8	forkhead box M1
GADD45A	ENSG00000116717	8	growth arrest and DNA damage inducible alpha
GLIS3	ENSG00000107249	8	GLIS family zinc finger 3
GNA14	ENSG00000156049	8	G protein subunit alpha 14
GPC5	ENSG00000179399	7	glypican 5
GRIK2	ENSG00000164418	3	glutamate ionotropic receptor kainate type subunit 2
HAVCR2	ENSG00000135077	8	hepatitis A virus cellular receptor 2
HOXA10	ENSG00000253293	8	homeobox A10
HOXA3	ENSG00000105997	8	homeobox A3
HOXD10	ENSG00000128710	8	homeobox D10
HOXD3	ENSG00000128652	8	homeobox D3
HPSE2	ENSG00000172987	8	heparanase 2
ID4	ENSG00000172201	8	inhibitor of DNA binding 4
IGHA2	ENSG00000211890	8	immunoglobulin heavy constant alpha 2 (A2m marker)
IL32	ENSG00000008517	8	interleukin 32
IL3RA	ENSG00000185291	8	interleukin 3 receptor subunit alpha
KDR	ENSG00000128052	8	kinase insert domain receptor
LHFPL3	ENSG00000187416	2	LHFPL tetraspan subfamily member 3
LIG4	ENSG00000174405	8	DNA ligase 4
LTA	ENSG00000226979	8	lymphotoxin alpha
MAPT	ENSG00000186868	8	microtubule associated protein tau
MCAM	ENSG00000076706	8	melanoma cell adhesion molecule
MEGF11	ENSG00000157890	8	multiple EGF like domains 11
MTUS2	ENSG00000132938	8	microtubule associated scaffold protein 2
NAV3	ENSG00000067798	8	neuron navigator 3
NTAN1	ENSG00000157045	8	N-terminal asparagine amidase
OPCML	ENSG00000183715	3	opioid binding protein/cell adhesion molecule like
PAX3	ENSG00000135903	8	paired box 3
PAX5	ENSG00000196092	8	paired box 5
PDPN	ENSG00000162493	8	podoplanin
PFKFB3	ENSG00000170525	8	6-phosphofructo-2-kinase/fructose-2,6-biphosphatase 3
PIEZO1	ENSG00000103335	8	piezo type mechanosensitive ion channel component 1
PLAUR	ENSG00000011422	8	plasminogen activator, urokinase receptor
RBFOX3	ENSG00000167281	8	RNA binding fox-1 homolog 3
ROBO1	ENSG00000169855	4	roundabout guidance receptor 1
SCD	ENSG00000099194	8	stearoyl-CoA desaturase
SELE	ENSG00000007908	8	selectin E
SELP	ENSG00000174175	8	selectin P
SERINC5	ENSG00000164300	8	serine incorporator 5
SLC14A1	ENSG00000141469	8	solute carrier family 14 member 1 (Kidd blood group)
SOCS6	ENSG00000170677	8	suppressor of cytokine signaling 6
SPOCD1	ENSG00000134668	8	SPOC domain containing 1
SYN3	ENSG00000185666	8	synapsin III
SYNDIG1	ENSG00000101463	8	synapse differentiation inducing 1
TBX5	ENSG00000089225	8	T-box transcription factor 5
TF	ENSG00000091513	8	transferrin
TNR	ENSG00000116147	5	tenascin R
TPD52L1	ENSG00000111907	8	TPD52 like 1
VWF	ENSG00000110799	8	von Willebrand factor
APP	ENSG00000142192	8	amyloid beta precursor protein
CAPN3	ENSG00000092529	8	calpain 3
CNDP1	ENSG00000150656	8	carnosine dipeptidase 1
CNTN2	ENSG00000184144	8	contactin 2
EFHD1	ENSG00000115468	8	EF-hand domain family member D1
ERBB3	ENSG00000065361	8	erb-b2 receptor tyrosine kinase 3
ERMN	ENSG00000136541	8	ermin
FOXB1	ENSG00000171956	8	forkhead box B1
FOXG1	ENSG00000176165	8	forkhead box G1
HHATL	ENSG00000010282	8	hedgehog acyltransferase like
MAG	ENSG00000105695	8	myelin associated glycoprotein
MAL	ENSG00000172005	8	mal, T cell differentiation protein
MYRF	ENSG00000124920	8	myelin regulatory factor
NCSTN	ENSG00000162736	8	nicastrin
OLIG1	ENSG00000184221	8	oligodendrocyte transcription factor 1
OLIG2	ENSG00000205927	8	oligodendrocyte transcription factor 2
OPALIN	ENSG00000197430	8	oligodendrocytic myelin paranodal and inner loop protein
SOX10	ENSG00000100146	8	SRY-box transcription factor 10
UGT8	ENSG00000174607	8	UDP glycosyltransferase 8
TERT	ENSG00000164362	8	Aberrantly overexpressed in GBM
BRAF	ENSG00000157764	8	Aberrantly overexpressed in planned GBM sample set
ACTA1	ENSG00000143632	8	Actin- cell motility
ACTA2	ENSG00000107796	8	Actin- cell motility
TMEM173	ENSG00000184584	8	aka STING
ATRX	ENSG00000085224	8	alternative telomere maintenance
VEGFA	ENSG00000112715	8	Angiogenesis
VEGFC	ENSG00000150630	8	Angiogenesis
GFAP	ENSG00000131095	8	Astrocyte, PreOPC
FGFR3	ENSG00000068078	8	Astrocytes
GJA1	ENSG00000152661	8	Astrocytes
MEIS2	ENSG00000134138	8	Astrocytes
PAX6	ENSG00000007372	8	Astrocytes
SPON1	ENSG00000262655	8	Astrocytes
IGHA1	ENSG00000211895	8	B cells
IGHE	ENSG00000211891	8	B cells
IGHG1	ENSG00000211896	8	B cells
IGHG2	ENSG00000211893	8	B cells
IGHM	ENSG00000211899	8	B cells
MS4A1	ENSG00000156738	8	B cells
SDC1	ENSG00000115884	8	B cells
AXIN2	ENSG00000168646	8	b-catenin signaling
PPARG	ENSG00000132170	8	b-catenin, myeloid suppression
CD276	ENSG00000103855	8	B7H3; immune checkpoint
CD248	ENSG00000174807	8	Cell adhesion
AURKB	ENSG00000178999	8	Cell cycle
CDK4	ENSG00000135446	8	Cell cycle
ALK	ENSG00000171094	8	Chandelier (Neurons)
ANK1	ENSG00000029534	8	Chandelier (Neurons)
CNTNAP3B	ENSG00000154529	8	Chandelier (Neurons)
LHX6	ENSG00000106852	8	Chandelier (Neurons)
PVALB	ENSG00000100362	8	Chandelier (Neurons)
SDK1	ENSG00000146555	8	Chandelier (Neurons)
TENM1	ENSG00000009694	8	Chandelier (Neurons)
UNC5B	ENSG00000107731	8	Chandelier (Neurons)
CX3CR1	ENSG00000168329	8	chem/cyt receptors
CXCR4	ENSG00000121966	8	chem/cyt receptors
CXCR6	ENSG00000172215	8	chem/cyt receptors
CCR2	ENSG00000121807	8	chem/cyt receptors
CCR5	ENSG00000160791	8	chem/cyt receptors
CCR7	ENSG00000126353	8	chem/cyt receptors
CXCR3	ENSG00000186810	8	chem/cyt receptors
XCR1	ENSG00000173578	8	chem/cyt receptors
CCL2	ENSG00000108691	6	Chemokines
CCL3	ENSG00000277632	7	Chemokines
CCL4	ENSG00000275302	2	Chemokines
CCL5	ENSG00000271503	8	Chemokines
CXCL10	ENSG00000169245	8	Chemokines
CXCL11	ENSG00000169248	8	Chemokines
CXCL12	ENSG00000107562	8	Chemokines
CXCL14	ENSG00000145824	8	Chemokines
CXCL9	ENSG00000138755	8	Chemokines
CCL19	ENSG00000172724	8	Chemokines
CCL21	ENSG00000137077	8	Chemokines
CCL4L2	ENSG00000276070	8	Chemokines
CXCL13	ENSG00000156234	8	Chemokines
CXCL8	ENSG00000169429	6	Chemokines
XCL1	ENSG00000143184	8	Chemokines
gB1_UL55	gB1_UL55	8	CMV
gb2_UL55	gb2_UL55	8	CMV
gb3_UL55	gb3_UL55	8	CMV
gb4_UL55	gb4_UL55	8	CMV
IE1_UL123	IE1_UL123	8	CMV
pp65_UL83	pp65_UL83	8	CMV
TGFB1	ENSG00000105329	8	Cytokines
TGFB2	ENSG00000092969	8	Cytokines
TGFB3	ENSG00000119699	8	Cytokines
IL6	ENSG00000136244	8	Cytokines
TNF	ENSG00000232810	8	Cytokines
FASLG	ENSG00000117560	8	Cytotoxicity
GZMA	ENSG00000145649	8	Cytotoxicity
GZMB	ENSG00000100453	8	Cytotoxicity
GZMK	ENSG00000113088	8	Cytotoxicity
PRF1	ENSG00000180644	8	Cytotoxicity (T cells, NK cells, Myeloid)
FLT3LG	ENSG00000090554	8	DC recruitment factor (myeloid/immune expressed)
BATF3	ENSG00000123685	7	DCs
CD1C	ENSG00000158481	8	DCs
CD207	ENSG00000116031	8	DCs
CD83	ENSG00000112149	3	DCs
CD86	ENSG00000114013	8	DCs
CLEC10A	ENSG00000132514	8	DCs
THBD	ENSG00000178726	8	DCs
CD40	ENSG00000101017	8	DCs
CLEC9A	ENSG00000197992	8	DCs
TRDV1	ENSG00000211804	2	delta T cells
TRDV2	ENSG00000211821	6	delta T cells
TRGV2	ENSG00000233306	8	delta T cells
TRGV5	ENSG00000211697	7	delta T cells
TRGV8	ENSG00000211696	7	delta T cells
TRGV9	ENSG00000211695	8	delta T cells
ATR	ENSG00000175054	8	DNA damage repair
MERTK	ENSG00000153208	8	Efferocytosis
HERV-K-Env	HERV-K-Env	8	Endog Retrovirus
HERV-K-Gag	HERV-K-Gag	8	Endog Retrovirus
CEMIP2	ENSG00000135048	8	Endothelial
FLT1	ENSG00000102755	8	Endothelial
NOTCH1	ENSG00000148400	8	Endothelial
NRP1	ENSG00000099250	8	Endothelial
RNF144B	ENSG00000137393	8	Endothelial
THSD4	ENSG00000187720	8	Endothelial
PECAM1	ENSG00000261371	8	Endothelial
SIGLEC8	ENSG00000105366	8	eosinophil
EPX	ENSG00000121053	8	Eosinophils
PRG2	ENSG00000186652	8	Eosinophils
RUNX1	ENSG00000159216	8	Epigenetic marker
CD38	ENSG00000004468	8	Exhuastion
CTLA4	ENSG00000163599	8	Exhuastion/Tregs
TIGIT	ENSG00000181847	8	Exhuastion/Tregs
COL1A2	ENSG00000164692	8	Extracellular matrix
COLEC12	ENSG00000158270	8	Extracellular matrix
FCER1G	ENSG00000158869	8	FC G receptors
FCGR1A	ENSG00000150337	8	FC G receptors
FCGR2B	ENSG00000072694	8	FC G receptors
FCGR3A	ENSG00000203747	8	FC G receptors
MGMT	ENSG00000170430	8	GBM prognostic marker
PIK3CA	ENSG00000121879	8	glioma oncogene
PIK3R1	ENSG00000145675	8	glioma oncogene
EGFR	ENSG00000146648	8	Glioma surv/growth
MKI67	ENSG00000148773	8	Glioma surv/growth
BCL2	ENSG00000171791	8	Glioma surv/growth
BIRC5	ENSG00000089685	8	Glioma surv/growth
MYC	ENSG00000136997	8	Glioma surv/growth
NF1	ENSG00000196712	8	glioma tumor suprressor
PTEN	ENSG00000171862	8	glioma tumor suprressor
NRXN1	ENSG00000179915	2	glioma:neuron synapse
NRXN3	ENSG00000021645	2	glioma:neuron synapse
BCL11B	ENSG00000127152	8	GluN
CD1B	ENSG00000158485	8	gt T cell recognition
CD34	ENSG00000174059	8	HSCs
IDO1	ENSG00000131203	8	IFN/ISGs
IFIT1	ENSG00000185745	8	IFN/ISGs
IFNA1	ENSG00000197919	8	IFN/ISGs
IFNA2	ENSG00000188379	8	IFN/ISGs
MX1	ENSG00000157601	8	IFN/ISGs
IFNG	ENSG00000111537	8	IFN/ISGs
AIF1	ENSG00000204472	6	Immune
C1orf162	ENSG00000143110	8	Immune
CAPG	ENSG00000042493	8	Immune
CORO1A	ENSG00000102879	8	Immune
CTSH	ENSG00000103811	8	Immune
CTSS	ENSG00000163131	8	Immune
CYTIP	ENSG00000115165	8	Immune
GNLY	ENSG00000115523	5	Immune
GPNMB	ENSG00000136235	8	Immune
GPR183	ENSG00000169508	8	Immune
GPR34	ENSG00000171659	8	Immune
KLRB1	ENSG00000111796	8	Immune
LY86	ENSG00000112799	8	Immune
MS4A6A	ENSG00000110077	8	Immune
NKG7	ENSG00000105374	7	Immune
NR4A2	ENSG00000153234	7	Immune
P2RY13	ENSG00000181631	8	Immune
RGS10	ENSG00000148908	8	Immune
RGS16	ENSG00000143333	8	Immune
RNASET2	ENSG00000026297	8	Immune
S100A4	ENSG00000196154	6	Immune
SPI1	ENSG00000066336	8	Immune
STXBP2	ENSG00000076944	8	Immune
TGFBI	ENSG00000120708	8	Immune
THBS1	ENSG00000137801	8	Immune
TMIGD3	ENSG00000121933	8	Immune
ITGA9	ENSG00000144668	8	integrin (tumor, myeloid)
CUX2	ENSG00000111249	8	L2/3 IT (Neurons)
TESPA1	ENSG00000135426	8	L2/3 IT (Neurons)
ZBBX	ENSG00000169064	8	L2/3 IT (Neurons)
ADAMTS16	ENSG00000145536	8	L4 IT (Neurons)
FSTL4	ENSG00000053108	8	L4 IT (Neurons)
HTR2A	ENSG00000102468	8	L4 IT (Neurons)
RIT2	ENSG00000152214	8	L4 IT (Neurons)
RORB	ENSG00000198963	8	L4 IT (Neurons)
SLC17A6	ENSG00000091664	8	L4 IT (Neurons)
SLIT3	ENSG00000184347	8	L4 IT (Neurons)
SNCG	ENSG00000173267	6	L4 IT (Neurons)
SORCS1	ENSG00000108018	8	L4 IT (Neurons)
ATP2C2	ENSG00000064270	8	L5/6 NP (Neurons)
CRYM	ENSG00000103316	8	L5/6 NP (Neurons)
TPH2	ENSG00000139287	8	L5/6 NP (Neurons)
TSHZ2	ENSG00000182463	8	L5/6 NP (Neurons)
VWC2L	ENSG00000174453	8	L5/6 NP (Neurons)
FILIP1	ENSG00000118407	8	L6 CT (neurons)
HS3ST2	ENSG00000122254	8	L6 CT (neurons)
HS3ST4	ENSG00000182601	8	L6 CT (neurons)
KCNH5	ENSG00000140015	8	L6 CT (neurons)
ADAMTS3	ENSG00000156140	8	L6 IT (neurons)
C1QL3	ENSG00000165985	8	L6 IT (neurons)
SNTB2	ENSG00000168807	8	L6 IT (neurons)
CDH12	ENSG00000154162	8	L6 IT Car3 (Neurons)
GAS2L3	ENSG00000139354	8	L6 IT Car3 (Neurons)
NPY1R	ENSG00000164128	8	L6 IT Car3 (Neurons)
NTNG2	ENSG00000196358	8	L6 IT Car3 (Neurons)
POSTN	ENSG00000133110	8	L6 IT Car3 (Neurons)
SLC26A4	ENSG00000091137	8	L6 IT Car3 (Neurons)
THEMIS	ENSG00000172673	8	L6 IT Car3 (Neurons)
TRPC5	ENSG00000072315	8	L6 IT Car3 (Neurons)
ZDHHC23	ENSG00000184307	8	L6 IT Car3 (Neurons)
ROS1	ENSG00000047936	8	L6b (neurons)
SLC17A7	ENSG00000104888	8	L6b (neurons)
DNER	ENSG00000187957	8	Lamp5 (neurons)
KIT	ENSG00000157404	8	Lamp5 (neurons)
PTCHD4	ENSG00000244694	8	Lamp5 (neurons)
EYA4	ENSG00000112319	8	Lamp5 Lhx6 (Neurons)
LAMP5	ENSG00000125869	8	Lamp5 Lhx6 (Neurons)
LYPD6	ENSG00000187123	8	Lamp5 Lhx6 (Neurons)
MYO16	ENSG00000041515	8	Lamp5 Lhx6 (Neurons)
NTNG1	ENSG00000162631	8	Lamp5 Lhx6 (Neurons)
PDGFD	ENSG00000170962	8	Lamp5 Lhx6 (Neurons)
SPHKAP	ENSG00000153820	8	Lamp5 Lhx6 (Neurons)
GAD2	ENSG00000136750	8	Lamp5 Lhx6, IN (Neurons)
CIC	ENSG00000079432	8	lower-grade glioma marker
FUBP1	ENSG00000162613	8	lower-grade glioma marker
MAP2K1	ENSG00000169032	8	MAPK signaling (tumor)
MAP2K2	ENSG00000126934	8	MAPK signaling (tumor)
CDKN2A	ENSG00000147889	8	Marker of astrocytoma progression
CD44	ENSG00000026508	8	Memory
LDLR	ENSG00000130164	8	Metabolism
P2RY12	ENSG00000169313	8	Mglia
TMEM119	ENSG00000183160	8	Mglia
HLA-E	ENSG00000204592	8	MHC presentation (myeloid/b cell)
HLA-G	ENSG00000204632	8	MHC presentation (myeloid/b cell)
HLA-DMB	ENSG00000242574	8	MHC-II GEP
HLA-DQA1	ENSG00000196735	8	MHC-II GEP
HLA-DRA	ENSG00000204287	2	MHC-II GEP
APOE	ENSG00000130203	2	Microglia-PVM
LYVE1	ENSG00000133800	8	Microglia-PVM
ARHGAP24	ENSG00000138639	8	Microglia-PVM
LRRK1	ENSG00000154237	8	Microglia-PVM
PCSK9	ENSG00000169174	8	Molecular target of interest
AHR	ENSG00000106546	8	Myeloid
ARNT	ENSG00000143437	8	Myeloid
CD14	ENSG00000170458	8	Myeloid
CD163	ENSG00000177575	8	Myeloid
CD36	ENSG00000135218	8	Myeloid
CD68	ENSG00000129226	8	Myeloid
ITGA8	ENSG00000077943	8	Myeloid
ITGAM	ENSG00000169896	8	Myeloid
ITGAX	ENSG00000140678	8	Myeloid
ITGB2	ENSG00000160255	8	Myeloid
KLF4	ENSG00000136826	8	Myeloid
STAT3	ENSG00000168610	8	Myeloid
ITGA4	ENSG00000115232	8	Myeloid
STAT4	ENSG00000138378	8	Myeloid
CD79A	ENSG00000105369	8	Myeloid immunosuppression
NLGN3	ENSG00000196338	8	Neuron-glioma signaling
MPO	ENSG00000005381	8	Neutrophil
SOD2	ENSG00000112096	8	Neutrophil
CEACAM8	ENSG00000124469	8	Neutrophils
NEUROG1	ENSG00000181965	8	nIPC
NCAM1	ENSG00000149294	8	NK cells
NCR1	ENSG00000189430	8	NK cells
NCR2	ENSG00000096264	8	NK cells
NCR3	ENSG00000204475	8	NK cells
KLRK1	ENSG00000213809	8	NK cells/CD8
MICA	ENSG00000204520	8	NK ligands
MICB	ENSG00000204516	8	NK ligands
RAET1G	ENSG00000203722	8	NK ligands
RAET1L	ENSG00000155918	8	NK ligands
ULBP1	ENSG00000111981	8	NK ligands
ULBP2	ENSG00000131015	8	NK ligands
CDH1	ENSG00000039068	8	Oligodendrocyte
CLDN11	ENSG00000013297	8	Oligodendrocyte
CTNNA3	ENSG00000183230	8	Oligodendrocyte
FGFR2	ENSG00000066468	8	Oligodendrocyte
MOBP	ENSG00000168314	8	Oligodendrocyte
ST18	ENSG00000147488	8	Oligodendrocyte
CALCRL	ENSG00000064989	8	OPC
LRRK2	ENSG00000188906	8	OPC
PDGFRA	ENSG00000134853	8	OPC
PTPRZ1	ENSG00000106278	4	OPC
SEMA5A	ENSG00000112902	8	OPC
STK32B	ENSG00000152953	8	OPC
VCAN	ENSG00000038427	6	OPC
MBP	ENSG00000197971	8	OPC/Oligo
NKX2-2	ENSG00000125820	8	OPC/Oligo
HOPX	ENSG00000171476	8	oRG
MOXD1	ENSG00000079931	8	oRG
TNC	ENSG00000041982	8	oRG
PTPRC	ENSG00000081237	8	Pan immune
ANGPT1	ENSG00000154188	8	Pax6
CCK	ENSG00000187094	8	Pax6
CDH4	ENSG00000179242	8	Pax6
DDR2	ENSG00000162733	8	Pax6
PLD5	ENSG00000180287	8	Pax6
RELN	ENSG00000189056	8	Pax6
SFRP2	ENSG00000145423	8	Pax6
CD274	ENSG00000120217	8	PDL1
PDCD1LG2	ENSG00000197646	8	PDL2- immune checkpoint
TREM2	ENSG00000095970	8	Phagocytosis
CD47	ENSG00000196776	8	Phagocytosis
SIRPA	ENSG00000198053	8	Phagocytosis
ASCL1	ENSG00000139352	8	PreOPC
PDCD1	ENSG00000188389	8	Priming/activ
BTBD11	ENSG00000151136	8	Pvalb
GAD1	ENSG00000128683	8	Pvalb
MEPE	ENSG00000152595	8	Pvalb
MYO5B	ENSG00000167306	8	Pvalb
RSPO2	ENSG00000147655	8	Pvalb
SAMD5	ENSG00000203727	8	Pvalb
SULF1	ENSG00000137573	8	Pvalb
ACKR1	ENSG00000213088	8	Race-differences. CD234, i.e. Duffy antigen/chemokine receptor
KLF2	ENSG00000127528	6	Residence memory
GPX3	ENSG00000211445	8	RG
NPY	ENSG00000122585	2	RG
VIM	ENSG00000026025	8	RG
ADRA1A	ENSG00000120907	8	Sncg
ADRA1B	ENSG00000170214	8	Sncg
LYPD6B	ENSG00000150556	8	Sncg
PROX1	ENSG00000117707	8	Sncg
THSD7B	ENSG00000144229	8	Sncg
SYNPR	ENSG00000163630	8	Sst
TRHDE	ENSG00000072657	8	Sst
ANKRD18A	ENSG00000180071	8	Sst Chodl
CRHBP	ENSG00000145708	8	Sst Chodl
NDST4	ENSG00000138653	8	Sst Chodl
SST	ENSG00000157005	4	Sst Chodl
TAC1	ENSG00000006128	8	Sst Chodl
TACR1	ENSG00000115353	8	Sst Chodl
TRPC6	ENSG00000137672	8	Sst Chodl
CD52	ENSG00000169442	6	Stemness
TCF7	ENSG00000081059	8	Stemness
IL7R	ENSG00000168685	8	Stemness/memory
CD48	ENSG00000117091	8	T activation
LAG3	ENSG00000089692	8	T cell exhuastion
TOX	ENSG00000198846	8	T cell exhuastion
TRAC	ENSG00000277734	8	T cell receptor alpha locus
TRBC1	ENSG00000211751	8	T cell receptor beta locus
TRGC1	ENSG00000211689	8	T cell receptor gamma
TRGC2	ENSG00000227191	8	T cell receptor gamma
CD3G	ENSG00000160654	8	T cells
CD4	ENSG00000010610	8	T cells
CD3D	ENSG00000167286	8	T cells
CD3E	ENSG00000198851	8	T cells
CD8A	ENSG00000153563	8	T cells
CD8B	ENSG00000172116	8	T cells
TRDC	ENSG00000211829	8	TCR delta constant
FOXP3	ENSG00000049768	8	Tregs
CRYAB	ENSG00000109846	8	tRG
FOXJ1	ENSG00000129654	8	tRG
ANXA1	ENSG00000135046	8	Tumor
AQP4	ENSG00000171885	8	Tumor
B4GALNT1	ENSG00000135454	8	Tumor
BCAN	ENSG00000132692	8	Tumor
CAV1	ENSG00000105974	8	Tumor
CCNA1	ENSG00000133101	8	Tumor
CCNB2	ENSG00000157456	8	Tumor
CDK1	ENSG00000170312	8	Tumor
CENPF	ENSG00000117724	8	Tumor
CHODL	ENSG00000154645	8	Tumor
ELOVL2	ENSG00000197977	8	Tumor
HILPDA	ENSG00000135245	8	Tumor
IGFBP3	ENSG00000146674	8	Tumor
IGFBP5	ENSG00000115461	8	Tumor
LOX	ENSG00000113083	8	Tumor
MGST1	ENSG00000008394	8	Tumor
NES	ENSG00000132688	8	Tumor
NNAT	ENSG00000053438	8	Tumor
PCNA	ENSG00000132646	8	Tumor
SOX11	ENSG00000176887	8	Tumor
SOX2	ENSG00000181449	8	Tumor
SOX4	ENSG00000124766	8	Tumor
TRIL	ENSG00000255690	8	Tumor
TTYH1	ENSG00000167614	8	Tumor
PDGFRB	ENSG00000113721	8	Tumor
ITGAE	ENSG00000083457	8	Tumor reactive TILs
TOX3	ENSG00000103460	8	tumor suppressor
TOP2A	ENSG00000131747	8	Tumor, Cycling
TP53	ENSG00000141510	8	Tumor, glioma tumor supressor
HES1	ENSG00000114315	8	Tumor, RG
SOX9	ENSG00000125398	8	Tumor, RG
SLC24A3	ENSG00000185052	8	Vip
VIP	ENSG00000146469	8	Vip
PVR	ENSG00000073008	8	Immune checkpoint
ABCC9	ENSG00000069431	8	VLMC
ADAMTS12	ENSG00000151388	8	VLMC
ANO3	ENSG00000134343	8	VLMC
CDH6	ENSG00000113361	8	VLMC
CEMIP	ENSG00000103888	8	VLMC
COL12A1	ENSG00000111799	8	VLMC
CSPG4	ENSG00000173546	8	VLMC
DCN	ENSG00000011465	8	VLMC
FBLN1	ENSG00000077942	8	VLMC
IGFBP4	ENSG00000141753	8	VLMC
MCTP2	ENSG00000140563	8	VLMC
NR2F2	ENSG00000185551	8	VLMC
PHLDB2	ENSG00000144824	8	VLMC
PLCE1	ENSG00000138193	8	VLMC
RFTN1	ENSG00000131378	8	VLMC
SERPINA3	ENSG00000196136	8	VLMC
CCN2	ENSG00000118523	8	vRG
FBXO32	ENSG00000156804	8	vRG
