# Supplementary material for: A Spatial Multi-Omic Framework Identifies Gliomas Permissive to TIL Expansion
Source: Research Square preprint supplement (doi:10.21203/rs.3.rs-6314842/v1), 2025-04-25
Supplement: Supplementary file 3 [file fe9e27ae7cc98fb1b6f9fadf.xlsx]

## Sheet: Panel Status
Marker	Status	8 TIL/no TILs?	Cell Type* not an exhaustive list				23-0257	23-0264		23-0258	23-0227	23-0021		22-0189	22-0160	23-0153			Legend
Arg1	working	all	myeloid, neutrophils, neural stem cell				working	working		working	working	working		iffy	iffy	iffy				not currently working, will reconjugate
aSMA	working	all	fibroblast				working	working		working	working	working		working	working	working				currently working
B-cat	working	all	glioblastoma				working	working		working	working	working		working	working	working
BCL2	working	all	NK				working	working		working	working	working		working	working	working				worked well
CD11b	working	all	neutrophils, microglia				working	working		working	working	working		working	working	working				did not work
CD138	working	all	B cells				working	working		working	working	working		working	working	working				worked okay
CD163	working	all	microglia				working	working		working	working	working		working	working	working
CD20	working	all	B cells				working	working		working	working	working		working	working	working
CD206	working	all	microglia				working	working		iffy	iffy	iffy		working	working	working
CD25	working	all	T cell				working	working		working	working	working		working	working	working
CD3	working	all	T Cells				working	working		working	working	working		working	working	working
CD31	working	all	vessel, nerve				working	working		working	working	working		working	working	working
CD34	working	all	vessel, nerve				working	working		working	working	working		working	working	working
CD36	working	all	vessels				working	working		working	working	working		working	working	working
CD38	working	all	B cells				working	working		working	working	working		working	working	working
CD4	working	all	T cell				working	working		working	working	working		working	working	working
CD45	working	all	mast cell, T cell				iffy	iffy		working	working	working		working	working	working
CD56	working	all	NK				working	working		working	working	working		working	working	working
CD68	working	all	macrophage, microglia				working	working		working	working	working		working	working	working
CD73	working	all					working	working		working	working	working		working	working	working
CD8	working	all	T cell				working	working		working	working	working		working	working	working
CD90	working	all	fibroblast, glioblastoma, T cells				working	working		working	working	working		working	working	working
DCN	working	all	fibroblast				working	working		working	working	working		working	working	working
FOXP3	working	all	T Cells (Tregs)				working	working		working	working	working		working	working	working
HLADR	working	all	DC				working	working		working	working	working		working	working	working
Ki67	working	all	glioblastoma				working	working		working	working	working		working	working	working
MMP9	working	all	neutrophils				working	working		working	working	working		working	working	working
p16	working	all					working	working		working	working	working		working	working	working
p53	working	all	glioblastoma				working	working		working	working	working		working	working	working
pH2AX	working	all	glioblastoma				working	working		working	working	working		working	working	working
Vimentin	working	all	glioblastoma				iffy	iffy		working	working	working		working	working	working
CD115	?		myeloid cells				-	-		-	-	-		?	?	?
Granzyme B	?		T Cells				-	-		iffy	iffy	iffy		iffy	iffy	iffy
MPO	?		neutrophils, monocytes				-	-		-	-	-		?	?	?
TCF7	?		T cell				-	-		?	?	?		?	?	?
TMEM119	?		microglia				-	-		-	-	-		iffy	iffy	iffy
Podo	?		fibroblast				working	working		working	working	working		?	?	?
CD23	working		B cells, T cells				-	-		-	-	-		-	-	-
CD57	working		NK				working	working		?	?	?		working	working	working
CD66b	working		neutrophils				-	-		-	-	-		working	working	working
GFAP	working		glioblastoma				-	-		working	working	working		working	working	working
LYVE1	working		vessel, nerve				working	working		?	?	?		working	working	working
MAST	working		mast cell				?	?		working	working	working		working	working	working
P2RY12	working		microglia				-	-		-	-	-		working	working	working
PD1	working		T cell				working	working		?	?	?		working	working	working
PDGRFab	working		fibroblast				-	-		working	working	working		working	working	working
PDL1	working		glioblastoma				?	?		working	working	working		?	?	?
PNAd	working		tertiary lymphoid structures (HEV endothelial cells)				-	-		-	-	-		-	-	-
Synaptophysin	working		neuroglia				-	-		iffy	iffy	iffy		working	working	working

## Sheet: Panel Markers
Marker	Cell Type* not an exhaustive list				Fibroblast	Vessel/Nerve	Pan-Epi	Glioblastoma	Microglia	T Cell	Neutrophil	Mast	NK	Virus
Arg1	myeloid, neutrophils, neural stem cell				aSMA	CD31	B-cat	B-cat	CD11b	PD1	Arg1	CD45	CD56	p16
aSMA	fibroblast				CD73	CD34		CD90	CD163	CD3	CD11b	MAST	BCL2	Peripheral Lymph Nodes
B-cat	glioblastoma, Pan-Epi				CD90	Synaptophysin	Function	Ki67	CD206	CD4	MMP9		CD57
CD11b	neutrophils, microglia				DCN	LYVE1	Ki67	p53	CD68	CD8	CD66b			PNAd
CD163	microglia, macrophage				Vimentin	CD36		pH2AX	P2RY12	CD90	MPO	DC	Macrophage
CD3	T Cells				PDGRFab			Vimentin	TMEM119	FOXP3	B Cell	HLADR	CD163
CD31	vessel, nerve							GFAP		CD25	CD20	CD23	CD115
CD34	vessel, nerve							PDL1	Neuroglia	Granzyme B	CD38		CD206
CD36	vessels							PDPN	Synaptophysin	TCF7	CD138		CD68
CD38	B cells
CD4	T cell
CD56	NK
CD73	fibroblast
CD8	T cell
CD90	fibroblast, glioblastoma, T cells
DCN	fibroblast
FOXP3	T Cells (Tregs)
HLADR	DC							`
Ki67	glioblastoma, function
MMP9	neutrophils
p16	virus?
p53	glioblastoma
pH2AX	glioblastoma
Vimentin	glioblastoma, fibroblast
BCL2	NK
CD115	myeloid cells?
CD138	B cells
CD20	B cells
CD206	microglia, macrophage
CD23	FDCs
CD25	T cell
CD45	mast cell
CD57	NK
CD66b	neutrophils
CD68	macrophage, microglia
GFAP	glioblastoma
Granzyme B	T Cells
LYVE1	vessel, nerve
MAST	mast cell
MPO	neutrophils, monocytes
P2RY12	microglia
PD1	T cell
PDGRFab	fibroblast
PDL1	glioblastoma
PNAd	tertiary lymphoid structures (HEV endothelial cells)
Podo (PDPN)	fibroblast
Synaptophysin	neuroglia, vessel/nerve
TCF7	T cell
TMEM119	microglia

## Sheet: Antibody Information All
Antibody	Clone	Company	Catalog Number	Oligo
Arg1
aSMA
B-cat
BCL2
CD115
CD11b
CD138
CD163
CD20
CD206
CD23
CD25
CD3
CD31
CD34
CD36
CD38
CD4
CD45
CD56
CD57
CD66b
CD68
CD73
CD8
CD90
DCN
FOXP3
GFAP
Granzyme B
HLADR
Ki67
LYVE1
MAST
MMP9
MPO
p16
P2RY12
p53
PD1
PDGRFab
PDL1
pH2AX
PNAd
Podo
Synaptophysin
TCF7
TMEM119
Vimentin

## Sheet: Antibody Information Manuscript
Antibody	Clone	Company	Catalog Number	Oligo
Arg1	Polyclonal			43
aSMA	Polyclonal	abcam	AB5694	69
B-cat	14	CellMarque		51
BCL2	124	CellMarque		41
CD11b	EPR1344	abcam	ab209970	28
CD138	DL-101	Biolegend	352302	76
CD163	EDHu-1	Novus	NB100-64980	45
CD20	rlGEL/773	Noovus	NBP2-54591	48
CD206	E2L9N	CST	49243SF	55
CD25	4C9	CellMarque	custom	24
CD3	MRQ-39	CellMarque	MRQ-39	77
CD31	C31.3+C31.7+C31.10	Novus	NBP2-47785	68
CD34	QBEnd/10			38
CD36	D8L9T			74
CD38	E7Z8	CST		66
CD4	EPR6855	abcam	ab181724	20
CD45	2B11 + PD7/26	Novus	NBP2-34287	56
CD56	MRQ-42	CellMarque	custom	29
CD68
CD73	Polyclonal	BD	AF5795	75
CD8	C8/144B	Invitrogen	MA5-13473	8
CD90	EPR3132			21
DCN	Polyclonal	Thermo		63
FOXP3	236A/E7	Invitrogen	14-4777-82	61
HLADR	EPR3692	abcam	ab209968	62
Ki67	B56	BD	556003	6
MMP9	L51/82	Biolegend	819701	80
p16	G175-405			59
p53	D07			52
pH2AX	EP854(2)Y			57
Vimentin	RV202	Novus	NBP1-97672	7

## Sheet: Multicycles
Date: 20240814	Well	Cycle #	Ax488	Oligo	uL/slide	Exp Time	Conjugate_ID	Comment	Cy3	Oligo	uL/slide	Exp Time	Conjugate_ID	Comment	Cy5	Oligo	uL/slide	Exp Time	Conjugate_ID	Comment
Samples	C1	1	Vimentin	A7	0.5	150		*, move to other color	LYVE1	A46	2	150		**, rare	DCN	A63	1	150		**
05-0465	C2	2	CD31	A68	0.5	150		**, weaker than expect	CD36	A74	1	150		**	CD90	A21	0.5	150		**
23-0257	C3	3	aSMA	A69	0.5	150		***	CD3	A77	0.5	150		**	CD73	A75	0.5	150		**
23-0264	C4	4	CD206	A55	0.5	150		**	CD57	A30	0.5	150		**	CD11b	A28	0.5	150		**, keep in cy5
07-0190	C5	5	CD34	A38	0.5	150		**	CD163	A45	0.5	150		**	CD4	A20	0.5	150		**, a lot bg as expected
04-0483	C6	6	BCL2	A41	0.5	150		**	p53	A52	0.5	150		**	PD1	A23	0.5	150		**
	C7	7	CD20	A48	0.5	150		**, rare	CD25	A24	0.5	150		**	Podo	A32	0.5	150		**
	C8	8	p63	A5	0.5	150		ND	pH2AX	A57	0.5	150		***	B-cat	A51	0.5	150		**
	C9	9	Ki67	A6	0.5	150		**	FOXP3	A61	0.5	150		**	CD8	A8	0.5	150		**
	C10	10	CD56	A29	0.5	150		***	MMP9	A80	0.5	150		***, reduce conc. to 1	p16	A59	0.5	150		**
	C11	11	Arg1	A43	0.5	150		**	Annex	A42	0.5	150		**	PDL1	A11	0.5	150		ND
	C12	12	CD45	A56	0.5	150		*, increase conc. to 1	Mast	A72	0.25	150		ND	CD103	A3	2	150		ND, too bright, reduce conc. to 0.5uL, change color
	D1	13	CD68	A70	0.5	150		**	SPP1	A25	2	150		ND, nuclei bg	EGFR	A17	2	150		ND, nuclei bg, change color
	D2	14	CD15	A14	0.5	150		ND	HLADR	A62	2	150		**, a lot bg, reduce conc. 1-0.5	CD138	A76	2	150		**
	D3	15	Cyto	A67	0.5	150		ND	CD38	A66	2	150		***, reduce conc. to 1	CD106	A65	2	150		ND, nuclei bg
	D4	16	CK14	A36	0.25	150		ND
	H3	17	Blank			150			Blank			150			Blank			150
	H4	18	Blank			150			Blank			150			Blank			150
Date: 20241003	Well	Cycle #	Ax488	Oligo	uL/slide	Exp Time	Conjugate_ID	Comment	Cy3	Oligo	uL/slide	Exp Time	Conjugate_ID	Comment	Cy5	Oligo	uL/slide	Exp Time	Conjugate_ID	Comment
Samples	A1	1	aSMA	A69	0.5	150		***	LYVE1	A46	2	150		ND	DCN	A63	1	150		***
11-0020	A2	2	CD206	A55	0.5	150		* move Cy3	CD36	A74	1	150		***	CD90	A21	0.5	150		***
23-0258	A3	3	CD34	A38	0.5	150		***, move channel	CD3	A77	0.5	150		***	CD73	A75	0.5	150		***
23-0227	A4	4	BCL2	A41	0.5	150		***	CD57	A30	0.5	150		ND?	CD11b	A28	0.5	150		***
23-0021	A5	5	CD20	A48	0.5	150		**	CD163	A45	0.5	150		***	CD4	A20	0.5	150		**
04-0483	A6	6	Ki67	A6	0.5	150		***	p53	A52	0.5	150		***	PD1	A23	0.5	150		ND
	A7	7	CD56	A29	0.5	150		***, move channel	CD25	A24	0.5	150		***	Podo	A32	0.5	150		**
	A8	8	Arg1	A43	0.5	150		**	pH2AX	A57	0.5	150		***	B-cat	A51	0.5	150		***
	A9	9	CD68	A70	0.5	150		**, move channel	FOXP3	A61	0.5	150		***	CD8	A8	0.5	150		***
	A10	10							MMP9	A80	0.5	150		***	p16	A59	0.5	150		***
	A11	11							Mast	A72	0.25	150		**, dilute	CD138	A76	1	150		**
	A12	12							HLADR	A62	1	150		***	Vimentin	A7	0.5	150		**, increase to 1uL
	B1	13							CD38	A66	1	150		***	CD31	A68	0.5	150		***
	B2	14							CD45	A56	1	150		***	TCF7	A5	2	150		move to Cy3
	B3	15							Synaptophysin	A25	2	150		*, move Cy5	PDL1	A11	2	150		**, switch to Cy3
	B4	16							Granzyme B	A36	2	150		*, move Cy5	PDGRFab	A33	2	150		***
	B5	17													GFAP	A26	2	150		***, decrease to .5
	H1	18	Blank			150			Blank			150			Blank			150
	H2	19	Blank			150			Blank			150			Blank			150
Date: 20241112	Well	Cycle #	Ax488	Oligo	uL/slide	Exp Time	Conjugate_ID	Comment	Cy3	Oligo	uL/slide	Exp Time	Conjugate_ID	Comment	Cy5	Oligo	uL/slide	Exp Time	Conjugate_ID	Comment
Samples	D1	1	aSMA	A69	0.5	150		***	PD1	A23	0.5	150		?	DCN	A63	1	150		***
12-0347	D2	2	BCL2	A41	0.5	150		change channel	CD36	A74	1	150		**	CD90	A21	0.5	150		**
22-0189	D3	3	CD20	A48	0.5	150		change channel	CD3	A77	0.5	150		***	CD73	A75	0.5	150		***
22-0160	D4	4	Ki67	A6	0.5	150		***	CD163	A45	0.5	150		***	CD11b	A28	0.5	150		** change channel, high back.
23-0153	D5	5	Arg1	A43	0.5	150		* change channel	p53	A52	0.5	150		***	CD4	A20	0.5	150		**
04-0483	D6	6	Mast	A72	0.5	75		change channel, dilute	CD25	A24	0.5	150		?	Podo	A32	0.5	150		nuclear background
	D7	7							pH2AX	A57	0.5	150		***	B-cat	A51	0.5	150		**
	D8	8							FOXP3	A61	0.5	150		***	CD8	A8	0.5	150		***
	D9	9							MMP9	A80	0.5	150		***	p16	A59	0.5	150		**
	D10	10							HLADR	A62	1	150		***	CD138	A76	1	150		?
	D11	11							CD38	A66	1	150		***	Vimentin	A7	1	150		**
	D12	12							CD45	A56	1	150		?	CD31	A68	0.5	150		**
	E1	13							CD206	A55	0.5	150		?	CD34	A38	0.5	150		***
	E2	14							CD56	A29	0.5	150		***	CD57	A30	0.5	150		***
	E3	15							CD68	A70	0.5	150		?	LYVE1	A46	2	150		***
	E4	16							TCF7	A5	2	150		?	GFAP	A26	0.5	150		***
	E5	17							PDL1	A11	2	150		change channel back	TMEM119	A53	2	150		* weak, change channel
	E6	18							MPO	A42	2	150		?	PDGRFab	A33	2	150		***
	E7	19							CD66b	A49	2	150		***	P2RY12	A2	2	150		**, dec.conc 1/2
	E8	20							CD115	A58	2	150		switch channel	Synaptophysin	A25	2	150		**, dec.conc 1/2
	E9	21													Granzyme B	A36	2	150		*, change channel, dec.conc.
	H3	22	Blank			150			Blank			150			Blank			150
	H4	23	Blank			150			Blank			150			Blank			150
